# Supplementary material
Source: PubMed Central journal article supplement (PMC2889362)
Supplement: 0915086107_pnas.200915086SI.pdf [file 0915086107_pnas.200915086SI.pdf]

# Supporting Information

Dhodapkar et al. 10.1073/pnas.0915086107

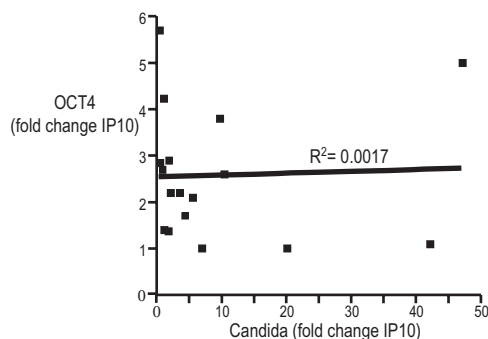

**Fig. S1.** Lack of correlation between OCT4 reactivity and CD4<sup>+</sup> T-cell immunity to candida. Data for OCT4 reactivity (fold-change in inducible protein-10 production) as in Fig. 4 is plotted against the data for CD4<sup>+</sup> T-cell reactivity to candida.

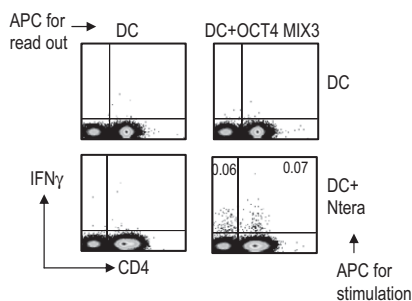

**Fig. S2.** Induction of OCT4-specific T cells by tumor-loaded dendritic cells (DCs). Monocyte-derived DCs alone (DC) or fed with irradiated embryonal carcinoma (N-tera) cells (DC+Ntera), and used to stimulate autologous T cells. Induction of OCT4-specific T cells was monitored using intracellular cytokine flow cytometry in response to autologous DCs alone or loaded with OCT4 peptide Mix 3.

## Table S1. Composition of OCT4 peptide library

[Table S1](#)

## Table S2. Representative output of BLAST analysis of an immune reactive OCT4 sequence

[Table S2](#)

## Table S3. Patient characteristics

[Table S3](#)
